# Supplementary material for: A humanized monoclonal antibody against the endothelial chemokine CCL21 for the diagnosis and treatment of inflammatory bowel disease
Source: PubMed Central journal article supplement (PMC8248966; doi:10.1371/journal.pone.0252805), 2021-07-01
Supplement: pone.0252805.s002.pdf [file pone.0252805.s002.pdf]

| % Mig CCL21   | Well #1 | Well #2 | Well #3 | Ave. |
|---------------|---------|---------|---------|------|
| CD3           | 14.7    | 16.7    | 17.6    | 16.3 |
| CD4           | 28.4    | 32.1    | 33.7    | 31.4 |
| CD8           | 6.9     | 8.7     | 9.5     | 8.4  |
| Naïve         | 33.8    | 38.0    | 39.8    | 37.2 |
| Naïve CD27+   | 33.8    | 38.0    | 39.8    | 37.2 |
| Group A       | 27.6    | 31.3    | 32.9    | 30.6 |
| Group A CD27+ | 27.3    | 31.0    | 32.6    | 30.3 |
| Group B&C     | 7.2     | 8.6     | 9.2     | 8.3  |
| B&C CD27+     | 7.0     | 8.3     | 8.9     | 8.1  |
| B&C CD27-     | 7.5     | 9.2     | 10.0    | 8.9  |

| % Mig #7      | Well #1 | Well #2 | Well #3 | Ave. |
|---------------|---------|---------|---------|------|
| CD3           | 15.9    | 12.3    | 14.0    | 14.0 |
| CD4           | 30.1    | 23.9    | 26.8    | 26.9 |
| CD8           | 5.2     | 2.6     | 3.8     | 3.9  |
| Naïve         | 34.4    | 27.5    | 30.8    | 30.9 |
| Naïve CD27+   | 34.4    | 27.5    | 30.8    | 30.9 |
| Group A       | 32.7    | 25.7    | 29.0    | 29.1 |
| Group A CD27+ | 31.9    | 25.1    | 28.3    | 28.5 |
| Group B&C     | 9.0     | 6.4     | 7.7     | 7.7  |
| B&C CD27+     | 8.2     | 5.8     | 6.9     | 7.0  |
| B&C CD27-     | 12.5    | 8.7     | 10.5    | 10.6 |

| % Mig #8      | Well #1 | Well #2 | Well #3 | Ave. |
|---------------|---------|---------|---------|------|
| CD3           | 0.3     | 1.3     | 1.5     | 1.1  |
| CD4           | 0.1     | 1.1     | 1.2     | 0.8  |
| CD8           | 0.0     | 0.0     | 0.2     | 0.1  |
| Naïve         | 0.0     | 0.2     | 0.3     | 0.2  |
| Naïve CD27+   | 0.0     | 0.2     | 0.3     | 0.2  |
| Group A       | 1.2     | 2.9     | 3.2     | 2.5  |
| Group A CD27+ | 1.1     | 2.7     | 2.9     | 2.2  |
| Group B&C     | 0.8     | 2.5     | 2.8     | 2.1  |
| B&C CD27+     | 0.2     | 1.6     | 1.8     | 1.2  |
| B&C CD27-     | 3.4     | 6.8     | 7.3     | 5.8  |

| % Mig #9      | Well #1 | Well #2 | Well #3 | Ave. |
|---------------|---------|---------|---------|------|
| CD3           | 9.0     | 7.8     | 5.6     | 7.5  |
| CD4           | 16.9    | 14.9    | 11.3    | 14.4 |
| CD8           | 2.2     | 1.1     | 0.0     | 1.1  |
| Naïve         | 18.3    | 16.2    | 12.5    | 15.7 |
| Naïve CD27+   | 18.3    | 16.2    | 12.5    | 15.7 |
| Group A       | 20.6    | 18.1    | 13.5    | 17.4 |
| Group A CD27+ | 19.9    | 17.5    | 13.1    | 16.9 |
| Group B&C     | 6.8     | 5.7     | 3.5     | 5.3  |
| B&C CD27+     | 6.0     | 5.0     | 3.1     | 4.7  |
| B&C CD27-     | 10.4    | 8.6     | 5.2     | 8.1  |

| % Mig #10     | Well #1 | Well #2 | Well #3 | Ave. |
|---------------|---------|---------|---------|------|
| CD3           | 16.9    | 15.2    | 18.0    | 16.7 |
| CD4           | 31.5    | 28.5    | 33.3    | 31.1 |
| CD8           | 6.1     | 4.8     | 6.9     | 6.0  |
| Naïve         | 35.7    | 32.4    | 37.7    | 35.3 |
| Naïve CD27+   | 35.7    | 32.4    | 37.7    | 35.2 |
| Group A       | 35.4    | 32.0    | 37.5    | 35.0 |
| Group A CD27+ | 34.6    | 31.2    | 36.6    | 34.1 |
| Group B&C     | 9.2     | 8.0     | 10.0    | 9.0  |
| B&C CD27+     | 8.6     | 7.4     | 9.2     | 8.4  |
| B&C CD27-     | 11.8    | 10.1    | 12.8    | 11.6 |

| % Mig #11     | Well #1 | Well #2 | Well #3 | Ave. |
|---------------|---------|---------|---------|------|
| CD3           | 18.0    | 19.7    | 18.3    | 18.7 |
| CD4           | 34.3    | 37.2    | 34.7    | 35.4 |
| CD8           | 6.2     | 7.4     | 6.4     | 6.7  |
| Naïve         | 39.0    | 42.2    | 39.5    | 40.2 |
| Naïve CD27+   | 38.9    | 42.1    | 39.4    | 40.2 |
| Group A       | 37.4    | 40.6    | 37.9    | 38.6 |
| Group A CD27+ | 36.5    | 39.7    | 37.0    | 37.8 |
| Group B&C     | 10.6    | 11.8    | 10.8    | 11.1 |
| B&C CD27+     | 10.1    | 11.2    | 10.3    | 10.5 |
| B&C CD27-     | 13.1    | 14.8    | 13.4    | 13.8 |

| % Mig #12     | Well #1 | Well #2 | Well #3 | Ave. |
|---------------|---------|---------|---------|------|
| CD3           | 21.5    | 23.7    | 19.0    | 21.4 |
| CD4           | 40.7    | 44.5    | 36.2    | 40.5 |
| CD8           | 8.3     | 9.8     | 6.6     | 8.2  |
| Naïve         | 47.3    | 51.7    | 42.2    | 47.1 |
| Naïve CD27+   | 47.3    | 51.7    | 42.3    | 47.1 |
| Group A       | 41.3    | 45.3    | 36.6    | 41.1 |
| Group A CD27+ | 40.7    | 44.7    | 36.1    | 40.5 |
| Group B&C     | 12.4    | 13.9    | 10.6    | 12.3 |
| B&C CD27+     | 11.3    | 12.7    | 9.7     | 11.2 |
| B&C CD27-     | 17.1    | 19.3    | 14.5    | 17.0 |

| % Mig #13     | Well #1 | Well #2 | Well #3 | Ave. |
|---------------|---------|---------|---------|------|
| CD3           | 19.6    | 20.7    | 18.1    | 19.5 |
| CD4           | 37.0    | 38.9    | 34.3    | 36.7 |
| CD8           | 8.6     | 9.4     | 7.4     | 8.5  |
| Naïve         | 42.1    | 44.2    | 39.1    | 41.8 |
| Naïve CD27+   | 42.2    | 44.2    | 39.1    | 41.8 |
| Group A       | 39.4    | 41.4    | 36.4    | 39.1 |
| Group A CD27+ | 38.7    | 40.7    | 35.8    | 38.4 |
| Group B&C     | 12.7    | 13.5    | 11.5    | 12.6 |
| B&C CD27+     | 12.0    | 12.8    | 10.9    | 11.9 |
| B&C CD27-     | 15.5    | 16.6    | 13.9    | 15.4 |

| % Mig #14     | Well #1 | Well #2 | Well #3 | Ave. |
|---------------|---------|---------|---------|------|
| CD3           | 19.6    | 23.2    | 20.3    | 21.0 |
| CD4           | 37.1    | 43.5    | 38.3    | 39.7 |
| CD8           | 8.1     | 10.8    | 8.6     | 9.2  |
| Naïve         | 42.5    | 49.6    | 43.8    | 45.3 |
| Naïve CD27+   | 42.5    | 49.6    | 43.8    | 45.3 |
| Group A       | 39.0    | 45.9    | 40.3    | 41.7 |
| Group A CD27+ | 38.2    | 45.0    | 39.5    | 40.9 |
| Group B&C     | 12.4    | 15.1    | 12.9    | 13.5 |
| B&C CD27+     | 11.6    | 14.2    | 12.1    | 12.6 |
| B&C CD27-     | 15.1    | 18.8    | 15.8    | 16.6 |

| % Mig #15     | Well #1 | Well #2 | Well #3 | Ave. |
|---------------|---------|---------|---------|------|
| CD3           | 15.2    | 14.1    | 16.6    | 15.3 |
| CD4           | 28.0    | 26.0    | 30.3    | 28.1 |
| CD8           | 6.6     | 5.7     | 7.8     | 6.7  |
| Naïve         | 31.8    | 29.6    | 34.3    | 31.9 |
| Naïve CD27+   | 31.8    | 29.6    | 34.3    | 31.9 |
| Group A       | 29.4    | 27.2    | 31.9    | 29.5 |
| Group A CD27+ | 29.1    | 26.9    | 31.5    | 29.2 |
| Group B&C     | 10.5    | 9.5     | 11.6    | 10.5 |
| B&C CD27+     | 9.7     | 8.8     | 10.8    | 9.8  |
| B&C CD27-     | 13.7    | 12.3    | 15.2    | 13.7 |
