# Supplementary material for: A humanized monoclonal antibody against the endothelial chemokine CCL21 for the diagnosis and treatment of inflammatory bowel disease
Source: PubMed Central journal article supplement (PMC8248966; doi:10.1371/journal.pone.0252805), 2021-07-01
Supplement: pone.0252805.s003.pdf [file pone.0252805.s003.pdf]

| % Mig CCL21   | Well #1 | Well #2 | Well #3 | Ave. | % Mig #16     | Well #1 | Well #2 | Well #3 | Ave. |
|---------------|---------|---------|---------|------|---------------|---------|---------|---------|------|
| CD3           | 23.5    | 23.8    | 22.1    | 23.1 | CD3           | 22.4    | 21.4    | 22.7    | 22.2 |
| CD4           | 39.4    | 40.0    | 37.1    | 38.8 | CD4           | 38.1    | 36.3    | 38.6    | 37.6 |
| CD8           | 21.8    | 22.2    | 20.5    | 21.5 | CD8           | 20.4    | 19.4    | 20.6    | 20.1 |
| Naïve         | 42.7    | 43.4    | 40.2    | 42.1 | Naïve         | 41.0    | 39.1    | 41.6    | 40.6 |
| Naïve CD27+   | 42.7    | 43.4    | 40.2    | 42.1 | Naïve CD27+   | 41.0    | 39.1    | 41.6    | 40.6 |
| Group A       | 38.5    | 39.1    | 36.3    | 38.0 | Group A       | 39.6    | 37.8    | 40.1    | 39.2 |
| Group A CD27+ | 38.6    | 39.2    | 36.4    | 38.1 | Group A CD27+ | 39.7    | 37.8    | 40.2    | 39.2 |
| Group B&C     | 35.7    | 36.2    | 33.6    | 35.2 | Group B&C     | 33.1    | 31.5    | 33.5    | 32.7 |
| B&C CD27+     | 40.7    | 41.3    | 38.3    | 40.1 | B&C CD27+     | 37.9    | 36.1    | 38.4    | 37.5 |
| B&C CD27-     | 19.9    | 20.3    | 18.7    | 19.6 | B&C CD27-     | 17.1    | 16.3    | 17.3    | 16.9 |

| % Mig #17     | Well #1 | Well #2 | Well #3 | Ave. | % Mig #18     | Well #1 | Well #2 | Well #3 | Ave. |
|---------------|---------|---------|---------|------|---------------|---------|---------|---------|------|
| CD3           | 23.6    | 22.9    | 24.1    | 23.5 | CD3           | 22.2    | 21.7    | 19.8    | 21.2 |
| CD4           | 40.4    | 39.3    | 41.3    | 40.4 | CD4           | 38.0    | 37.3    | 34.0    | 36.4 |
| CD8           | 21.3    | 20.7    | 21.8    | 21.3 | CD8           | 20.5    | 20.1    | 18.3    | 19.6 |
| Naïve         | 42.7    | 41.5    | 43.7    | 42.7 | Naïve         | 39.8    | 39.0    | 35.6    | 38.1 |
| Naïve CD27+   | 42.7    | 41.5    | 43.7    | 42.7 | Naïve CD27+   | 39.8    | 39.0    | 35.6    | 38.1 |
| Group A       | 40.5    | 39.4    | 41.4    | 40.5 | Group A       | 39.4    | 38.6    | 35.2    | 37.7 |
| Group A CD27+ | 40.6    | 39.5    | 41.5    | 40.5 | Group A CD27+ | 39.4    | 38.7    | 35.2    | 37.8 |
| Group B&C     | 40.8    | 39.6    | 41.7    | 40.7 | Group B&C     | 38.0    | 37.3    | 33.9    | 36.4 |
| B&C CD27+     | 47.6    | 46.2    | 48.6    | 47.5 | B&C CD27+     | 43.8    | 42.9    | 39.1    | 41.9 |
| B&C CD27-     | 19.1    | 18.5    | 19.5    | 19.0 | B&C CD27-     | 19.7    | 19.3    | 17.5    | 18.8 |

| % Mig #19     | Well #1 | Well #2 | Well #3 | Ave. | % Mig #20     | Well #1 | Well #2 | Well #3 | Ave. |
|---------------|---------|---------|---------|------|---------------|---------|---------|---------|------|
| CD3           | 23.8    | 24.6    | 22.7    | 23.7 | CD3           | 21.0    | 19.1    | 19.4    | 19.8 |
| CD4           | 41.2    | 42.7    | 39.3    | 41.0 | CD4           | 35.2    | 32.1    | 32.6    | 33.3 |
| CD8           | 22.5    | 23.4    | 21.5    | 22.5 | CD8           | 19.8    | 18.0    | 18.3    | 18.7 |
| Naïve         | 41.3    | 42.8    | 39.4    | 41.2 | Naïve         | 37.8    | 34.5    | 35.0    | 35.8 |
| Naïve CD27+   | 41.3    | 42.8    | 39.4    | 41.2 | Naïve CD27+   | 37.8    | 34.5    | 35.1    | 35.8 |
| Group A       | 42.6    | 44.2    | 40.7    | 42.5 | Group A       | 34.8    | 31.7    | 32.3    | 32.9 |
| Group A CD27+ | 42.7    | 44.3    | 40.8    | 42.6 | Group A CD27+ | 34.9    | 31.8    | 32.4    | 33.0 |
| Group B&C     | 48.4    | 50.1    | 46.1    | 48.2 | Group B&C     | 34.4    | 31.3    | 31.8    | 32.5 |
| B&C CD27+     | 56.5    | 58.5    | 53.8    | 56.3 | B&C CD27+     | 40.5    | 36.8    | 37.5    | 38.2 |
| B&C CD27-     | 22.6    | 23.4    | 21.5    | 22.5 | B&C CD27-     | 14.9    | 13.4    | 13.7    | 14.0 |

| % Mig #21     | Well #1 | Well #2 | Well #3 | Ave. | % Mig #22     | Well #1 | Well #2 | Well #3 | Ave. |
|---------------|---------|---------|---------|------|---------------|---------|---------|---------|------|
| CD3           | 19.9    | 17.9    | 18.5    | 18.8 | CD3           | 22.5    | 23.5    | 24.3    | 23.4 |
| CD4           | 34.7    | 31.3    | 32.4    | 32.8 | CD4           | 38.8    | 40.5    | 41.8    | 40.4 |
| CD8           | 18.3    | 16.5    | 17.1    | 17.3 | CD8           | 20.9    | 21.9    | 22.6    | 21.8 |
| Naïve         | 37.3    | 33.7    | 34.9    | 35.3 | Naïve         | 41.0    | 42.7    | 44.1    | 42.6 |
| Naïve CD27+   | 37.3    | 33.7    | 34.9    | 35.3 | Naïve CD27+   | 41.0    | 42.7    | 44.1    | 42.6 |
| Group A       | 35.4    | 32.0    | 33.1    | 33.5 | Group A       | 41.1    | 42.9    | 44.3    | 42.8 |
| Group A CD27+ | 35.6    | 32.1    | 33.2    | 33.6 | Group A CD27+ | 41.2    | 43.0    | 44.4    | 42.9 |
| Group B&C     | 31.3    | 28.2    | 29.2    | 29.6 | Group B&C     | 36.5    | 38.2    | 39.4    | 38.0 |
| B&C CD27+     | 36.3    | 32.7    | 33.9    | 34.3 | B&C CD27+     | 42.1    | 43.9    | 45.4    | 43.8 |
| B&C CD27-     | 15.2    | 13.6    | 14.1    | 14.3 | B&C CD27-     | 18.7    | 19.6    | 20.2    | 19.5 |

| % Mig #23     | Well #1 | Well #2 | Well #3 | Ave. | % Mig #24     | Well #1 | Well #2 | Well #3 | Ave. |
|---------------|---------|---------|---------|------|---------------|---------|---------|---------|------|
| CD3           | 20.0    | 18.4    | 18.3    | 18.9 | CD3           | 23.3    | 22.4    | 23.9    | 23.2 |
| CD4           | 34.2    | 31.5    | 31.2    | 32.3 | CD4           | 40.8    | 39.3    | 41.9    | 40.7 |
| CD8           | 19.4    | 17.9    | 17.7    | 18.3 | CD8           | 20.8    | 20.0    | 21.3    | 20.7 |
| Naïve         | 36.1    | 33.3    | 33.0    | 34.1 | Naïve         | 44.3    | 42.6    | 45.4    | 44.1 |
| Naïve CD27+   | 36.1    | 33.3    | 33.0    | 34.1 | Naïve CD27+   | 44.3    | 42.6    | 45.4    | 44.1 |
| Group A       | 33.6    | 31.0    | 30.7    | 31.8 | Group A       | 42.3    | 40.7    | 43.4    | 42.1 |
| Group A CD27+ | 33.7    | 31.1    | 30.8    | 31.9 | Group A CD27+ | 42.3    | 40.7    | 43.4    | 42.1 |
| Group B&C     | 35.4    | 32.5    | 32.2    | 33.4 | Group B&C     | 34.9    | 33.6    | 35.8    | 34.8 |
| B&C CD27+     | 41.6    | 38.3    | 37.9    | 39.3 | B&C CD27+     | 40.3    | 38.7    | 41.3    | 40.1 |
| B&C CD27-     | 15.3    | 14.1    | 13.9    | 14.4 | B&C CD27-     | 18.2    | 17.5    | 18.7    | 18.2 |
