# Supplementary material for: A humanized monoclonal antibody against the endothelial chemokine CCL21 for the diagnosis and treatment of inflammatory bowel disease
Source: PubMed Central journal article supplement (PMC8248966; doi:10.1371/journal.pone.0252805), 2021-07-01
Supplement: pone.0252805.s004.pdf [file pone.0252805.s004.pdf]

| % Mig CCL21   | Well #1 | Well #2 | Well #3 | Ave. | % Mig #25     | Well #1 | Well #2 | Well #3 | Ave. |
|---------------|---------|---------|---------|------|---------------|---------|---------|---------|------|
| CD3           | 23.5    | 23.8    | 22.1    | 23.1 | CD3           | 26.0    | 26.3    | 24.8    | 25.7 |
| CD4           | 39.4    | 40.0    | 37.1    | 38.8 | CD4           | 44.0    | 44.5    | 42.0    | 43.5 |
| CD8           | 21.8    | 22.2    | 20.5    | 21.5 | CD8           | 24.6    | 24.9    | 23.5    | 24.3 |
| Naïve         | 42.7    | 43.4    | 40.2    | 42.1 | Naïve         | 48.1    | 48.6    | 45.9    | 47.5 |
| Naïve CD27+   | 42.7    | 43.4    | 40.2    | 42.1 | Naïve CD27+   | 48.1    | 48.6    | 45.9    | 47.5 |
| Group A       | 38.5    | 39.1    | 36.3    | 38.0 | Group A       | 45.4    | 45.9    | 43.3    | 44.9 |
| Group A CD27+ | 38.6    | 39.2    | 36.4    | 38.1 | Group A CD27+ | 45.4    | 46.0    | 43.4    | 44.9 |
| Group B&C     | 35.7    | 36.2    | 33.6    | 35.2 | Group B&C     | 37.1    | 37.5    | 35.3    | 36.6 |
| B&C CD27+     | 40.7    | 41.3    | 38.3    | 40.1 | B&C CD27+     | 43.3    | 43.8    | 41.3    | 42.8 |
| B&C CD27-     | 19.9    | 20.3    | 18.7    | 19.6 | B&C CD27-     | 16.7    | 16.9    | 15.9    | 16.5 |

| % Mig #26     | Well #1 | Well #2 | Well #3 | Ave. | % Mig #27     | Well #1 | Well #2 | Well #3 | Ave. |
|---------------|---------|---------|---------|------|---------------|---------|---------|---------|------|
| CD3           | 27.4    | 25.4    | 28.0    | 26.9 | CD3           | 22.1    | 22.8    | 24.5    | 23.1 |
| CD4           | 47.5    | 44.0    | 48.5    | 46.7 | CD4           | 37.7    | 38.9    | 41.7    | 39.4 |
| CD8           | 26.2    | 24.3    | 26.8    | 25.8 | CD8           | 20.9    | 21.6    | 23.2    | 21.9 |
| Naïve         | 51.6    | 47.8    | 52.7    | 50.7 | Naïve         | 40.3    | 41.5    | 44.6    | 42.1 |
| Naïve CD27+   | 51.6    | 47.8    | 52.7    | 50.7 | Naïve CD27+   | 40.3    | 41.5    | 44.6    | 42.1 |
| Group A       | 50.3    | 46.6    | 51.4    | 49.4 | Group A       | 39.8    | 41.0    | 44.1    | 41.6 |
| Group A CD27+ | 50.4    | 46.7    | 51.5    | 49.5 | Group A CD27+ | 39.9    | 41.1    | 44.2    | 41.7 |
| Group B&C     | 39.0    | 36.1    | 39.9    | 38.3 | Group B&C     | 33.5    | 34.6    | 37.2    | 35.1 |
| B&C CD27+     | 45.3    | 41.9    | 46.3    | 44.5 | B&C CD27+     | 39.1    | 40.4    | 43.4    | 40.9 |
| B&C CD27-     | 18.2    | 16.8    | 18.6    | 17.9 | B&C CD27-     | 16.0    | 16.5    | 17.8    | 16.8 |

| % Mig #28     | Well #1 | Well #2 | Well #3 | Ave. | % Mig #29     | Well #1 | Well #2 | Well #3 | Ave. |
|---------------|---------|---------|---------|------|---------------|---------|---------|---------|------|
| CD3           | 25.2    | 26.4    | 25.0    | 25.6 | CD3           | 20.7    | 19.9    | 19.2    | 19.9 |
| CD4           | 43.1    | 45.0    | 42.7    | 43.6 | CD4           | 35.2    | 33.9    | 32.7    | 33.9 |
| CD8           | 24.4    | 25.5    | 24.2    | 24.7 | CD8           | 19.4    | 18.7    | 18.0    | 18.7 |
| Naïve         | 45.4    | 47.4    | 45.1    | 46.0 | Naïve         | 37.1    | 35.7    | 34.5    | 35.8 |
| Naïve CD27+   | 45.4    | 47.4    | 45.1    | 46.0 | Naïve CD27+   | 37.1    | 35.7    | 34.5    | 35.8 |
| Group A       | 45.4    | 47.4    | 45.1    | 46.0 | Group A       | 37.8    | 36.4    | 35.2    | 36.5 |
| Group A CD27+ | 45.6    | 47.6    | 45.2    | 46.1 | Group A CD27+ | 37.8    | 36.4    | 35.1    | 36.4 |
| Group B&C     | 40.9    | 42.8    | 40.6    | 41.4 | Group B&C     | 31.8    | 30.6    | 29.5    | 30.6 |
| B&C CD27+     | 47.6    | 49.7    | 47.2    | 48.1 | B&C CD27+     | 36.8    | 35.4    | 34.2    | 35.5 |
| B&C CD27-     | 20.3    | 21.2    | 20.1    | 20.6 | B&C CD27-     | 15.0    | 14.5    | 13.9    | 14.5 |

| % Mig #30     | Well #1 | Well #2 | Well #3 | Ave. | % Mig #31     | Well #1 | Well #2 | Well #3 | Ave. |
|---------------|---------|---------|---------|------|---------------|---------|---------|---------|------|
| CD3           | 23.7    | 23.0    | 24.5    | 23.8 | CD3           | 22.5    | 21.3    | 21.6    | 21.8 |
| CD4           | 42.8    | 41.5    | 44.3    | 42.8 | CD4           | 41.7    | 39.5    | 40.1    | 40.5 |
| CD8           | 20.2    | 19.5    | 20.8    | 20.2 | CD8           | 19.8    | 18.7    | 19.0    | 19.2 |
| Naïve         | 46.3    | 44.9    | 47.9    | 46.4 | Naïve         | 42.2    | 40.0    | 40.6    | 40.9 |
| Naïve CD27+   | 46.3    | 44.9    | 47.9    | 46.4 | Naïve CD27+   | 42.2    | 40.0    | 40.6    | 40.9 |
| Group A       | 47.7    | 46.1    | 49.2    | 47.7 | Group A       | 46.5    | 44.0    | 44.7    | 45.1 |
| Group A CD27+ | 47.7    | 46.2    | 49.3    | 47.8 | Group A CD27+ | 46.5    | 44.1    | 44.8    | 45.1 |
| Group B&C     | 32.9    | 31.9    | 34.1    | 32.9 | Group B&C     | 44.2    | 41.8    | 42.5    | 42.8 |
| B&C CD27+     | 37.3    | 36.1    | 38.6    | 37.3 | B&C CD27+     | 51.2    | 48.5    | 49.2    | 49.6 |
| B&C CD27-     | 19.5    | 18.9    | 20.2    | 19.5 | B&C CD27-     | 23.0    | 21.7    | 22.0    | 22.2 |

| % Mig #32     | Well #1 | Well #2 | Well #3 | Ave. | % Mig #33     | Well #1 | Well #2 | Well #3 | Ave. |
|---------------|---------|---------|---------|------|---------------|---------|---------|---------|------|
| CD3           | 23.6    | 24.0    | 22.8    | 23.4 | CD3           | 23.2    | 24.5    | 21.6    | 23.1 |
| CD4           | 41.9    | 42.6    | 40.5    | 41.7 | CD4           | 40.1    | 42.3    | 37.3    | 39.9 |
| CD8           | 21.6    | 22.0    | 20.9    | 21.5 | CD8           | 22.1    | 23.3    | 20.6    | 22.0 |
| Naïve         | 45.3    | 46.1    | 43.8    | 45.0 | Naïve         | 42.8    | 45.1    | 39.8    | 42.6 |
| Naïve CD27+   | 45.3    | 46.1    | 43.8    | 45.0 | Naïve CD27+   | 42.8    | 45.1    | 39.8    | 42.6 |
| Group A       | 42.8    | 43.6    | 41.4    | 42.6 | Group A       | 43.5    | 45.9    | 40.4    | 43.3 |
| Group A CD27+ | 42.9    | 43.7    | 41.5    | 42.7 | Group A CD27+ | 43.6    | 45.9    | 40.5    | 43.3 |
| Group B&C     | 37.4    | 38.1    | 36.1    | 37.2 | Group B&C     | 34.0    | 35.9    | 31.6    | 33.8 |
| B&C CD27+     | 43.9    | 44.7    | 42.4    | 43.7 | B&C CD27+     | 39.0    | 41.2    | 36.3    | 38.8 |
| B&C CD27-     | 15.9    | 16.2    | 15.4    | 15.8 | B&C CD27-     | 18.3    | 19.4    | 17.0    | 18.2 |
