# Supplementary material for: A humanized monoclonal antibody against the endothelial chemokine CCL21 for the diagnosis and treatment of inflammatory bowel disease
Source: PubMed Central journal article supplement (PMC8248966; doi:10.1371/journal.pone.0252805), 2021-07-01
Supplement: pone.0252805.s005.pdf [file pone.0252805.s005.pdf]

| % Mig CCL21   | Well #1 | Well #2 | Well #3 | Ave. | % Mig #34     | Well #1 | Well #2 | Well #3 | Ave. |
|---------------|---------|---------|---------|------|---------------|---------|---------|---------|------|
| CD3           | 23.5    | 23.8    | 22.1    | 23.1 | CD3           | 20.1    | 19.8    | 18.5    | 19.4 |
| CD4           | 39.4    | 40.0    | 37.1    | 38.8 | CD4           | 34.8    | 34.3    | 32.2    | 33.8 |
| CD8           | 21.8    | 22.2    | 20.5    | 21.5 | CD8           | 18.7    | 18.4    | 17.2    | 18.1 |
| Naïve         | 42.7    | 43.4    | 40.2    | 42.1 | Naïve         | 37.3    | 36.7    | 34.4    | 36.1 |
| Naïve CD27+   | 42.7    | 43.4    | 40.2    | 42.1 | Naïve CD27+   | 37.3    | 36.7    | 34.4    | 36.1 |
| Group A       | 38.5    | 39.1    | 36.3    | 38.0 | Group A       | 36.9    | 36.4    | 34.1    | 35.8 |
| Group A CD27+ | 38.6    | 39.2    | 36.4    | 38.1 | Group A CD27+ | 37.0    | 36.4    | 34.2    | 35.9 |
| Group B&C     | 35.7    | 36.2    | 33.6    | 35.2 | Group B&C     | 30.2    | 29.7    | 27.8    | 29.3 |
| B&C CD27+     | 40.7    | 41.3    | 38.3    | 40.1 | B&C CD27+     | 35.3    | 34.8    | 32.6    | 34.2 |
| B&C CD27-     | 19.9    | 20.3    | 18.7    | 19.6 | B&C CD27-     | 12.8    | 12.6    | 11.8    | 12.4 |

| % Mig #35     | Well #1 | Well #2 | Well #3 | Ave. | % Mig #36     | Well #1 | Well #2 | Well #3 | Ave. |
|---------------|---------|---------|---------|------|---------------|---------|---------|---------|------|
| CD3           | 19.7    | 18.5    | 18.0    | 18.8 | CD3           | 21.8    | 22.7    | 23.1    | 22.5 |
| CD4           | 34.7    | 32.6    | 31.8    | 33.0 | CD4           | 40.2    | 41.8    | 42.5    | 41.5 |
| CD8           | 17.9    | 16.8    | 16.3    | 17.0 | CD8           | 17.5    | 18.2    | 18.5    | 18.0 |
| Naïve         | 36.5    | 34.2    | 33.4    | 34.7 | Naïve         | 41.5    | 43.1    | 43.9    | 42.9 |
| Naïve CD27+   | 36.5    | 34.2    | 33.4    | 34.7 | Naïve CD27+   | 41.5    | 43.1    | 43.9    | 42.9 |
| Group A       | 37.3    | 35.0    | 34.2    | 35.5 | Group A       | 43.8    | 45.5    | 46.3    | 45.2 |
| Group A CD27+ | 37.4    | 35.1    | 34.2    | 35.6 | Group A CD27+ | 43.9    | 45.6    | 46.5    | 45.3 |
| Group B&C     | 32.1    | 30.1    | 29.3    | 30.5 | Group B&C     | 39.0    | 40.6    | 41.3    | 40.3 |
| B&C CD27+     | 37.4    | 35.1    | 34.2    | 35.5 | B&C CD27+     | 45.5    | 47.3    | 48.2    | 47.0 |
| B&C CD27-     | 14.8    | 13.8    | 13.4    | 14.0 | B&C CD27-     | 18.4    | 19.2    | 19.5    | 19.0 |

| % Mig #37     | Well #1 | Well #2 | Well #3 | Ave. | % Mig #38     | Well #1 | Well #2 | Well #3 | Ave. |
|---------------|---------|---------|---------|------|---------------|---------|---------|---------|------|
| CD3           | 22.2    | 21.8    | 21.3    | 21.8 | CD3           | 19.9    | 18.8    | 19.4    | 19.4 |
| CD4           | 38.9    | 38.2    | 37.3    | 38.2 | CD4           | 34.1    | 32.2    | 33.3    | 33.2 |
| CD8           | 20.1    | 19.7    | 19.3    | 19.7 | CD8           | 19.1    | 18.1    | 18.7    | 18.6 |
| Naïve         | 40.8    | 40.1    | 39.1    | 40.0 | Naïve         | 35.6    | 33.7    | 34.8    | 34.7 |
| Naïve CD27+   | 40.8    | 40.1    | 39.1    | 40.0 | Naïve CD27+   | 35.6    | 33.7    | 34.8    | 34.7 |
| Group A       | 40.7    | 40.0    | 39.0    | 39.9 | Group A       | 35.8    | 33.9    | 35.0    | 34.9 |
| Group A CD27+ | 40.7    | 40.0    | 39.1    | 40.0 | Group A CD27+ | 35.9    | 34.0    | 35.1    | 35.0 |
| Group B&C     | 38.1    | 37.4    | 36.5    | 37.3 | Group B&C     | 33.5    | 31.7    | 32.7    | 32.6 |
| B&C CD27+     | 44.6    | 43.9    | 42.8    | 43.8 | B&C CD27+     | 39.4    | 37.2    | 38.4    | 38.3 |
| B&C CD27-     | 16.6    | 16.3    | 15.9    | 16.3 | B&C CD27-     | 14.5    | 13.7    | 14.1    | 14.1 |

| % Mig #39     | Well #1 | Well #2 | Well #3 | Ave. |
|---------------|---------|---------|---------|------|
| CD3           | 21.3    | 21.7    | 22.3    | 21.8 |
| CD4           | 36.2    | 36.9    | 37.8    | 37.0 |
| CD8           | 20.3    | 20.6    | 21.1    | 20.7 |
| Naïve         | 38.1    | 38.8    | 39.8    | 38.9 |
| Naïve CD27+   | 38.1    | 38.8    | 39.8    | 38.9 |
| Group A       | 39.3    | 40.0    | 41.0    | 40.1 |
| Group A CD27+ | 39.3    | 40.0    | 41.0    | 40.1 |
| Group B&C     | 32.8    | 33.3    | 34.2    | 33.4 |
| B&C CD27+     | 38.0    | 38.7    | 39.6    | 38.8 |
| B&C CD27-     | 16.1    | 16.4    | 16.9    | 16.5 |
