# Supplementary material for: A humanized monoclonal antibody against the endothelial chemokine CCL21 for the diagnosis and treatment of inflammatory bowel disease
Source: PubMed Central journal article supplement (PMC8248966; doi:10.1371/journal.pone.0252805), 2021-07-01
Supplement: pone.0252805.s006.pdf [file pone.0252805.s006.pdf]

| Donor 1 CD3+ CD4+ | % Migration |          |
|-------------------|-------------|----------|
|                   | Control     | Clone #8 |
| Well 1            | 28          | 0        |
| Well 2            | 32          | 1        |
| Well 3            | 34          | 1        |
| Average           | 31.3        | 0.7      |

| Donor 2 CD3+ CD4+ | % Migration |          |
|-------------------|-------------|----------|
|                   | Control     | Clone #8 |
| Well 1            | 47.9        | 6.4      |
| Well 2            | 54.9        | 10.4     |
| Well 3            | 46.3        | 3.2      |
| Average           | 49.7        | 6.7      |

| Donor 3 CD3+ CD4+ | % Migration |          |
|-------------------|-------------|----------|
|                   | Control     | Clone #8 |
| Well 1            | 64.8        | 12.4     |
| Well 2            | 57.1        | 17.2     |
| Well 3            | 60.4        | 8.3      |
| Average           | 60.8        | 12.6     |
