# Supplementary material for: A humanized monoclonal antibody against the endothelial chemokine CCL21 for the diagnosis and treatment of inflammatory bowel disease
Source: PubMed Central journal article supplement (PMC8248966; doi:10.1371/journal.pone.0252805), 2021-07-01
Supplement: pone.0252805.s007.pdf [file pone.0252805.s007.pdf]

| # Cells       | Input  | CCL21-none    | Well #1 | Well #2 | Well #3 |
|---------------|--------|---------------|---------|---------|---------|
| CD3           | 152080 | CD3           | 22300   | 25456   | 26802   |
| CD4           | 71325  | CD4           | 20271   | 22896   | 24016   |
| CD8           | 21900  | CD8           | 1513    | 1914    | 2085    |
| Naïve         | 45862  | Naïve         | 15509   | 17439   | 18262   |
| Naïve CD27+   | 45816  | Naïve CD27+   | 15486   | 17412   | 18234   |
| Group A       | 14622  | Group A       | 4031    | 4577    | 4810    |
| Group A CD27+ | 14285  | Group A CD27+ | 3906    | 4433    | 4658    |
| Group B&C     | 9558   | Group B&C     | 683     | 818     | 875     |
| B&C CD27+     | 7942   | B&C CD27+     | 556     | 663     | 708     |
| B&C CD27-     | 1491   | B&C CD27-     | 111     | 138     | 149     |

| % Mig CCL21   | Well #1 | Well #2 | Well #3 | Ave. |
|---------------|---------|---------|---------|------|
| CD3           | 15      | 17      | 18      | 16   |
| CD4           | 28      | 32      | 34      | 31   |
| CD8           | 7       | 9       | 10      | 8    |
| Naïve         | 34      | 38      | 40      | 37   |
| Naïve CD27+   | 34      | 38      | 40      | 37   |
| Group A       | 28      | 31      | 33      | 31   |
| Group A CD27+ | 27      | 31      | 33      | 30   |
| Group B&C     | 7       | 9       | 9       | 8    |
| B&C CD27+     | 7       | 8       | 9       | 8    |
| B&C CD27-     | 7       | 9       | 10      | 9    |

| # 7-none      | Well #1 | Well #2 | Well #3 |
|---------------|---------|---------|---------|
| CD3           | 24109   | 18694   | 21239   |
| CD4           | 21488   | 17037   | 19129   |
| CD8           | 1137    | 563     | 833     |
| Naïve         | 15787   | 12632   | 14115   |
| Naïve CD27+   | 15764   | 12614   | 14095   |
| Group A       | 4782    | 3762    | 4241    |
| Group A CD27+ | 4560    | 3590    | 4046    |
| Group B&C     | 864     | 614     | 732     |
| B&C CD27+     | 650     | 462     | 550     |
| B&C CD27-     | 187     | 130     | 157     |

| St. Dev. | % Mig #7      | Well #1 | Well #2 | Well #3 | Ave. | St. Dev. |
|----------|---------------|---------|---------|---------|------|----------|
| 2        | CD3           | 16      | 12      | 14      | 14   | 2        |
| 3        | CD4           | 30      | 24      | 27      | 27   | 3        |
| 1        | CD8           | 5       | 3       | 4       | 4    | 1        |
| 3        | Naïve         | 34      | 28      | 31      | 31   | 3        |
| 3        | Naïve CD27+   | 34      | 28      | 31      | 31   | 3        |
| 3        | Group A       | 33      | 26      | 29      | 29   | 3        |
| 3        | Group A CD27+ | 32      | 25      | 28      | 28   | 3        |
| 1        | Group B&C     | 9       | 6       | 8       | 8    | 1        |
| 1        | B&C CD27+     | 8       | 6       | 7       | 7    | 1        |
| 1        | B&C CD27-     | 13      | 9       | 11      | 11   | 2        |

p Values to CCL21 alone

|               |               |
|---------------|---------------|
| CD3           | 0.1605        |
| CD4           | 0.1439        |
| CD8           | <b>0.0426</b> |
| Naïve         | 0.1059        |
| Naïve CD27+   | 0.1059        |
| Group A       | 0.3535        |
| Group A CD27+ | 0.3120        |
| Group B&C     | 0.3440        |
| B&C CD27+     | 0.2185        |
| B&C CD27-     | 0.2167        |

| # 8-none      | Well #1 | Well #2 | Well #3 |  |  | # 9-none      |
|---------------|---------|---------|---------|--|--|---------------|
| CD3           | 469     | 2050    | 2305    |  |  | CD3           |
| CD4           | 64      | 758     | 870     |  |  | CD4           |
| CD8           | 0       | 0       | 36      |  |  | CD8           |
| Naïve         | 0       | 90      | 132     |  |  | Naïve         |
| Naïve CD27+   | 0       | 91      | 133     |  |  | Naïve CD27+   |
| Group A       | 179     | 430     | 471     |  |  | Group A       |
| Group A CD27+ | 151     | 382     | 419     |  |  | Group A CD27+ |
| Group B&C     | 77      | 243     | 270     |  |  | Group B&C     |
| B&C CD27+     | 15      | 126     | 144     |  |  | B&C CD27+     |
| B&C CD27-     | 50      | 101     | 109     |  |  | B&C CD27-     |

| % Mig #8      | Well #1 | Well #2 | Well #3 | Ave. | St. Dev. | % Mig #9      |
|---------------|---------|---------|---------|------|----------|---------------|
| CD3           | 0       | 1       | 2       | 1    | 1        | CD3           |
| CD4           | 0       | 1       | 1       | 1    | 1        | CD4           |
| CD8           | 0       | 0       | 0       | 0    | 0        | CD8           |
| Naïve         | 0       | 0       | 0       | 0    | 0        | Naïve         |
| Naïve CD27+   | 0       | 0       | 0       | 0    | 0        | Naïve CD27+   |
| Group A       | 1       | 3       | 3       | 2    | 1        | Group A       |
| Group A CD27+ | 1       | 3       | 3       | 2    | 1        | Group A CD27+ |
| Group B&C     | 1       | 3       | 3       | 2    | 1        | Group B&C     |
| B&C CD27+     | 0       | 2       | 2       | 1    | 1        | B&C CD27+     |
| B&C CD27-     | 3       | 7       | 7       | 6    | 2        | B&C CD27-     |

p Values to CCL21 alone

|               |               |               |
|---------------|---------------|---------------|
| CD3           | <b>0.0006</b> | CD3           |
| CD4           | <b>0.0008</b> | CD4           |
| CD8           | <b>0.0038</b> | CD8           |
| Naïve         | <b>0.0010</b> | Naïve         |
| Naïve CD27+   | <b>0.0010</b> | Naïve CD27+   |
| Group A       | <b>0.0006</b> | Group A       |
| Group A CD27+ | <b>0.0006</b> | Group A CD27+ |
| Group B&C     | <b>0.0002</b> | Group B&C     |
| B&C CD27+     | <b>0.0001</b> | B&C CD27+     |
| B&C CD27-     | <b>0.0133</b> | B&C CD27-     |

| Well #1 | Well #2 | Well #3 | # 10-none     | Well #1 | Well #2 |
|---------|---------|---------|---------------|---------|---------|
| 13750   | 11912   | 8520    | CD3           | 25769   | 23105   |
| 12085   | 10663   | 8038    | CD4           | 22487   | 20328   |
| 482     | 243     | -197    | CD8           | 1343    | 1058    |
| 8377    | 7443    | 5718    | Naïve         | 16372   | 14853   |
| 8378    | 7444    | 5721    | Naïve CD27+   | 16347   | 14831   |
| 3015    | 2650    | 1978    | Group A       | 5183    | 4674    |
| 2849    | 2505    | 1870    | Group A CD27+ | 4942    | 4458    |
| 652     | 541     | 335     | Group B&C     | 881     | 763     |
| 480     | 397     | 245     | B&C CD27+     | 680     | 590     |
| 155     | 128     | 78      | B&C CD27-     | 176     | 150     |

| Well #1 | Well #2 | Well #3 | Ave. | St. Dev. | % Mig #10     | Well #1 | Well #2 |
|---------|---------|---------|------|----------|---------------|---------|---------|
| 9       | 8       | 6       | 7    | 2        | CD3           | 17      | 15      |
| 17      | 15      | 11      | 14   | 3        | CD4           | 32      | 29      |
| 2       | 1       | 0       | 1    | 1        | CD8           | 6       | 5       |
| 18      | 16      | 12      | 16   | 3        | Naïve         | 36      | 32      |
| 18      | 16      | 12      | 16   | 3        | Naïve CD27+   | 36      | 32      |
| 21      | 18      | 14      | 17   | 4        | Group A       | 35      | 32      |
| 20      | 18      | 13      | 17   | 3        | Group A CD27+ | 35      | 31      |
| 7       | 6       | 4       | 5    | 2        | Group B&C     | 9       | 8       |
| 6       | 5       | 3       | 5    | 2        | B&C CD27+     | 9       | 7       |
| 10      | 9       | 5       | 8    | 3        | B&C CD27-     | 12      | 10      |

p Values to CCL21 alone

|               |               |
|---------------|---------------|
| <b>0.0205</b> | CD3           |
| <b>0.0164</b> | CD4           |
| <b>0.0175</b> | CD8           |
| <b>0.0120</b> | Naïve         |
| <b>0.0121</b> | Naïve CD27+   |
| <b>0.0334</b> | Group A       |
| <b>0.0306</b> | Group A CD27+ |
| 0.0969        | Group B&C     |
| 0.0691        | B&C CD27+     |
| 0.3735        | B&C CD27-     |

| Well #3 | # 11-none     | Well #1 | Well #2 | Well #3 |
|---------|---------------|---------|---------|---------|
| 27356   | CD3           | 27450   | 29949   | 27838   |
| 23772   | CD4           | 24459   | 26531   | 24781   |
| 1513    | CD8           | 1362    | 1617    | 1402    |
| 17277   | Naïve         | 17868   | 19334   | 18095   |
| 17250   | Naïve CD27+   | 17840   | 19304   | 18067   |
| 5487    | Group A       | 5462    | 5937    | 5536    |
| 5231    | Group A CD27+ | 5220    | 5673    | 5290    |
| 951     | Group B&C     | 1013    | 1128    | 1030    |
| 734     | B&C CD27+     | 801     | 891     | 815     |
| 191     | B&C CD27-     | 196     | 220     | 200     |

| Well #3 | Ave. | St. Dev. | % Mig #11     | Well #1 | Well #2 | Well #3 | Ave. |
|---------|------|----------|---------------|---------|---------|---------|------|
| 18      | 17   | 1        | CD3           | 18      | 20      | 18      | 19   |
| 33      | 31   | 2        | CD4           | 34      | 37      | 35      | 35   |
| 7       | 6    | 1        | CD8           | 6       | 7       | 6       | 7    |
| 38      | 35   | 3        | Naïve         | 39      | 42      | 39      | 40   |
| 38      | 35   | 3        | Naïve CD27+   | 39      | 42      | 39      | 40   |
| 38      | 35   | 3        | Group A       | 37      | 41      | 38      | 39   |
| 37      | 34   | 3        | Group A CD27+ | 37      | 40      | 37      | 38   |
| 10      | 9    | 1        | Group B&C     | 11      | 12      | 11      | 11   |
| 9       | 8    | 1        | B&C CD27+     | 10      | 11      | 10      | 11   |
| 13      | 12   | 1        | B&C CD27-     | 13      | 15      | 13      | 14   |

p Values to CCL21 alone

0.3857  
0.4493  
0.0580  
0.2302  
0.2302  
0.0850  
0.1018  
0.2114  
0.3486  
0.0599

CD3  
CD4  
CD8  
Naïve  
Naïve CD27+  
Group A  
Group A CD27+  
Group B&C  
B&C CD27+  
B&C CD27-

p Values to CCL21 alon

0.0540  
0.0572  
0.0706  
0.1107  
0.1107  
**0.0173**  
**0.0195**  
**0.0203**  
**0.0233**  
**0.0113**

| # 12-none     | Well #1 | Well #2 | Well #3 |
|---------------|---------|---------|---------|
| CD3           | 32674   | 35979   | 28862   |
| CD4           | 29014   | 31774   | 25832   |
| CD8           | 1820    | 2151    | 1439    |
| Naïve         | 21686   | 23692   | 19372   |
| Naïve CD27+   | 21673   | 23677   | 19362   |
| Group A       | 6037    | 6627    | 5356    |
| Group A CD27+ | 5815    | 6383    | 5161    |
| Group B&C     | 1181    | 1327    | 1013    |
| B&C CD27+     | 896     | 1007    | 769     |
| B&C CD27-     | 255     | 288     | 217     |

| St. Dev. | % Mig #12     | Well #1 | Well #2 | Well #3 | Ave. | St. Dev. |
|----------|---------------|---------|---------|---------|------|----------|
| 1        | CD3           | 21      | 24      | 19      | 21   | 2        |
| 2        | CD4           | 41      | 45      | 36      | 40   | 4        |
| 1        | CD8           | 8       | 10      | 7       | 8    | 2        |
| 2        | Naïve         | 47      | 52      | 42      | 47   | 5        |
| 2        | Naïve CD27+   | 47      | 52      | 42      | 47   | 5        |
| 2        | Group A       | 41      | 45      | 37      | 41   | 4        |
| 2        | Group A CD27+ | 41      | 45      | 36      | 41   | 4        |
| 1        | Group B&C     | 12      | 14      | 11      | 12   | 2        |
| 1        | B&C CD27+     | 11      | 13      | 10      | 11   | 1        |
| 1        | B&C CD27-     | 17      | 19      | 15      | 17   | 2        |

e

p Values to CCL21 alone

|               |               |
|---------------|---------------|
| CD3           | 0.0558        |
| CD4           | 0.0544        |
| CD8           | 0.4615        |
| Naïve         | 0.0588        |
| Naïve CD27+   | 0.0584        |
| Group A       | <b>0.0450</b> |
| Group A CD27+ | <b>0.0462</b> |
| Group B&C     | <b>0.0443</b> |
| B&C CD27+     | 0.0587        |
| B&C CD27-     | <b>0.0226</b> |

| # 13-none     | Well #1 | Well #2 | Well #3 |  |  | # 14-none     |
|---------------|---------|---------|---------|--|--|---------------|
| CD3           | 29880   | 31473   | 27520   |  |  | CD3           |
| CD4           | 26404   | 27722   | 24453   |  |  | CD4           |
| CD8           | 1887    | 2062    | 1628    |  |  | CD8           |
| Naïve         | 19330   | 20268   | 17943   |  |  | Naïve         |
| Naïve CD27+   | 19320   | 20256   | 17934   |  |  | Naïve CD27+   |
| Group A       | 5764    | 6060    | 5327    |  |  | Group A       |
| Group A CD27+ | 5534    | 5817    | 5115    |  |  | Group A CD27+ |
| Group B&C     | 1212    | 1289    | 1098    |  |  | Group B&C     |
| B&C CD27+     | 955     | 1015    | 866     |  |  | B&C CD27+     |
| B&C CD27-     | 231     | 248     | 208     |  |  | B&C CD27-     |

| % Mig #13     | Well #1 | Well #2 | Well #3 | Ave. | St. Dev. | % Mig #14     |
|---------------|---------|---------|---------|------|----------|---------------|
| CD3           | 20      | 21      | 18      | 19   | 1        | CD3           |
| CD4           | 37      | 39      | 34      | 37   | 2        | CD4           |
| CD8           | 9       | 9       | 7       | 8    | 1        | CD8           |
| Naïve         | 42      | 44      | 39      | 42   | 3        | Naïve         |
| Naïve CD27+   | 42      | 44      | 39      | 42   | 3        | Naïve CD27+   |
| Group A       | 39      | 41      | 36      | 39   | 3        | Group A       |
| Group A CD27+ | 39      | 41      | 36      | 38   | 2        | Group A CD27+ |
| Group B&C     | 13      | 13      | 11      | 13   | 1        | Group B&C     |
| B&C CD27+     | 12      | 13      | 11      | 12   | 1        | B&C CD27+     |
| B&C CD27-     | 16      | 17      | 14      | 15   | 1        | B&C CD27-     |

p Values to CCL21 alone

|               |               |               |
|---------------|---------------|---------------|
| CD3           | 0.0742        | CD3           |
| CD4           | 0.0791        | CD4           |
| CD8           | 0.4687        | CD8           |
| Naïve         | 0.1165        | Naïve         |
| Naïve CD27+   | 0.1150        | Naïve CD27+   |
| Group A       | <b>0.0392</b> | Group A       |
| Group A CD27+ | <b>0.0417</b> | Group A CD27+ |
| Group B&C     | <b>0.0247</b> | Group B&C     |
| B&C CD27+     | <b>0.0272</b> | B&C CD27+     |
| B&C CD27-     | <b>0.0187</b> | B&C CD27-     |

| Well #1 | Well #2 | Well #3 | # 15-none     | Well #1 | Well #2 |
|---------|---------|---------|---------------|---------|---------|
| 29818   | 35317   | 30853   | CD3           | 23170   | 21379   |
| 26491   | 31061   | 27351   | CD4           | 19962   | 18538   |
| 1777    | 2365    | 1887    | CD8           | 1456    | 1239    |
| 19478   | 22741   | 20093   | Naïve         | 14573   | 13572   |
| 19468   | 22727   | 20081   | Naïve CD27+   | 14567   | 13567   |
| 5698    | 6708    | 5888    | Group A       | 4299    | 3982    |
| 5458    | 6423    | 5639    | Group A CD27+ | 4150    | 3845    |
| 1183    | 1446    | 1232    | Group B&C     | 1000    | 906     |
| 924     | 1127    | 962     | B&C CD27+     | 774     | 702     |
| 225     | 280     | 236     | B&C CD27-     | 204     | 183     |

| Well #1 | Well #2 | Well #3 | Ave. | St. Dev. | % Mig #15     | Well #1 | Well #2 |
|---------|---------|---------|------|----------|---------------|---------|---------|
| 20      | 23      | 20      | 21   | 2        | CD3           | 15      | 14      |
| 37      | 44      | 38      | 40   | 3        | CD4           | 28      | 26      |
| 8       | 11      | 9       | 9    | 1        | CD8           | 7       | 6       |
| 42      | 50      | 44      | 45   | 4        | Naïve         | 32      | 30      |
| 42      | 50      | 44      | 45   | 4        | Naïve CD27+   | 32      | 30      |
| 39      | 46      | 40      | 42   | 4        | Group A       | 29      | 27      |
| 38      | 45      | 39      | 41   | 4        | Group A CD27+ | 29      | 27      |
| 12      | 15      | 13      | 13   | 1        | Group B&C     | 10      | 9       |
| 12      | 14      | 12      | 13   | 1        | B&C CD27+     | 10      | 9       |
| 15      | 19      | 16      | 17   | 2        | B&C CD27-     | 14      | 12      |

p Values to CCL21 alone

|               |               |
|---------------|---------------|
| <b>0.0258</b> | CD3           |
| <b>0.0260</b> | CD4           |
| 0.2323        | CD8           |
| <b>0.0336</b> | Naïve         |
| <b>0.0333</b> | Naïve CD27+   |
| <b>0.0167</b> | Group A       |
| <b>0.0178</b> | Group A CD27+ |
| <b>0.0120</b> | Group B&C     |
| <b>0.0135</b> | B&C CD27+     |
| <b>0.0096</b> | B&C CD27-     |



Well #3  
25215  
21589  
1703  
15716  
15709  
4662  
4499  
1108  
857  
227

| Well #3 | Ave. | St. Dev. |
|---------|------|----------|
| 17      | 15   | 1        |
| 30      | 28   | 2        |
| 8       | 7    | 1        |
| 34      | 32   | 2        |
| 34      | 32   | 2        |
| 32      | 30   | 2        |
| 31      | 29   | 2        |
| 12      | 11   | 1        |
| 11      | 10   | 1        |
| 15      | 14   | 1        |

p Values to CCL21 alone

0.1898  
0.0903  
0.0866  
0.0509  
0.0514  
0.2954  
0.2790  
**0.0430**  
0.0605  
**0.0180**
