# Supplementary material for: A humanized monoclonal antibody against the endothelial chemokine CCL21 for the diagnosis and treatment of inflammatory bowel disease
Source: PubMed Central journal article supplement (PMC8248966; doi:10.1371/journal.pone.0252805), 2021-07-01

IBD biopsies stained for CCL21 using C8

S19-8111 (C1)

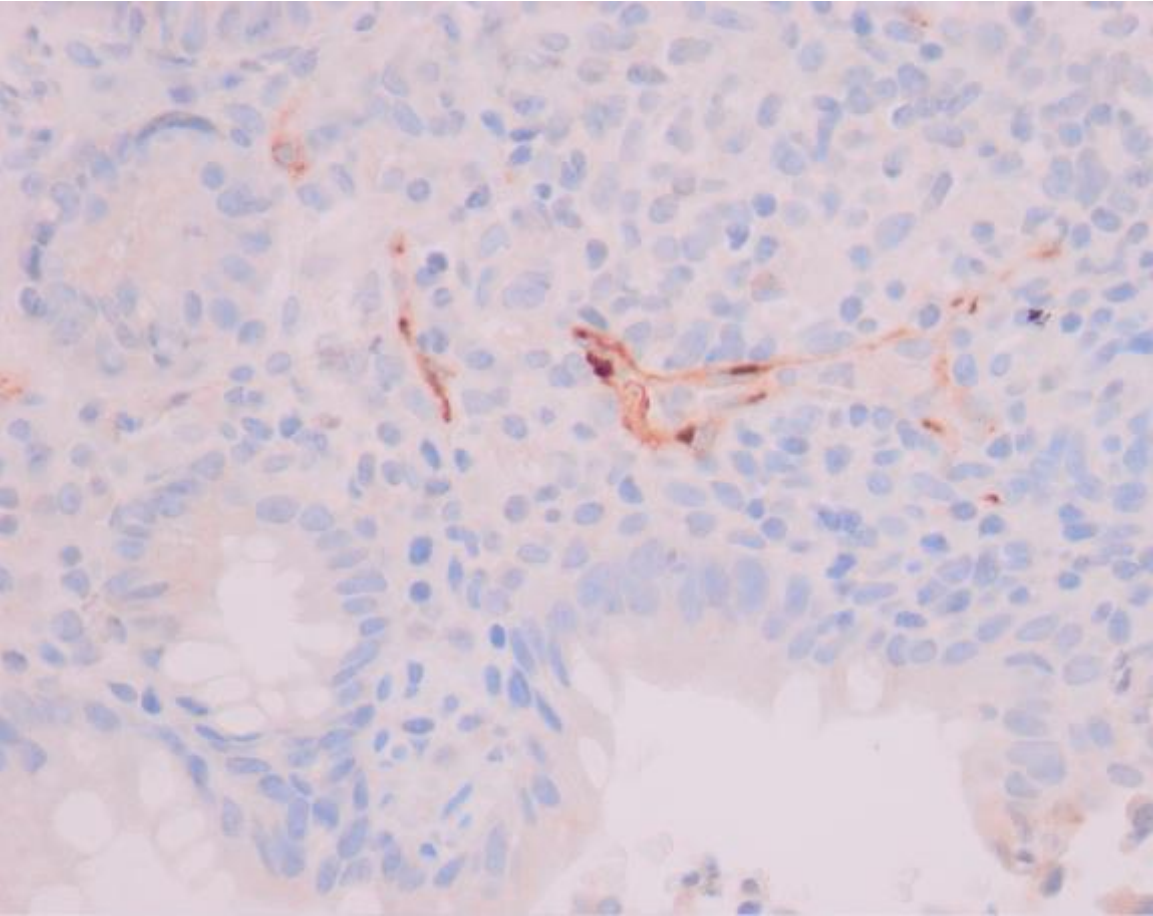

S19-8111 (D1)

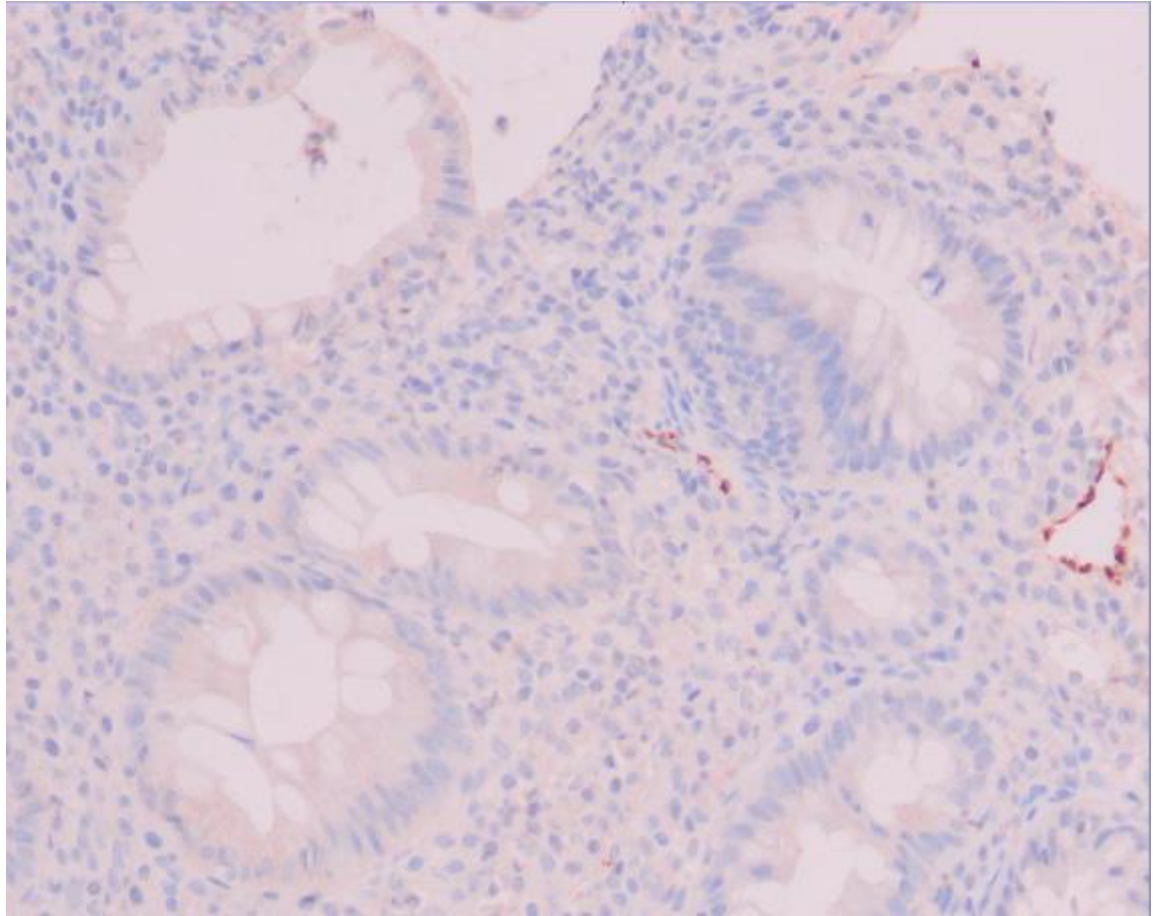

S19-14718 (A1)

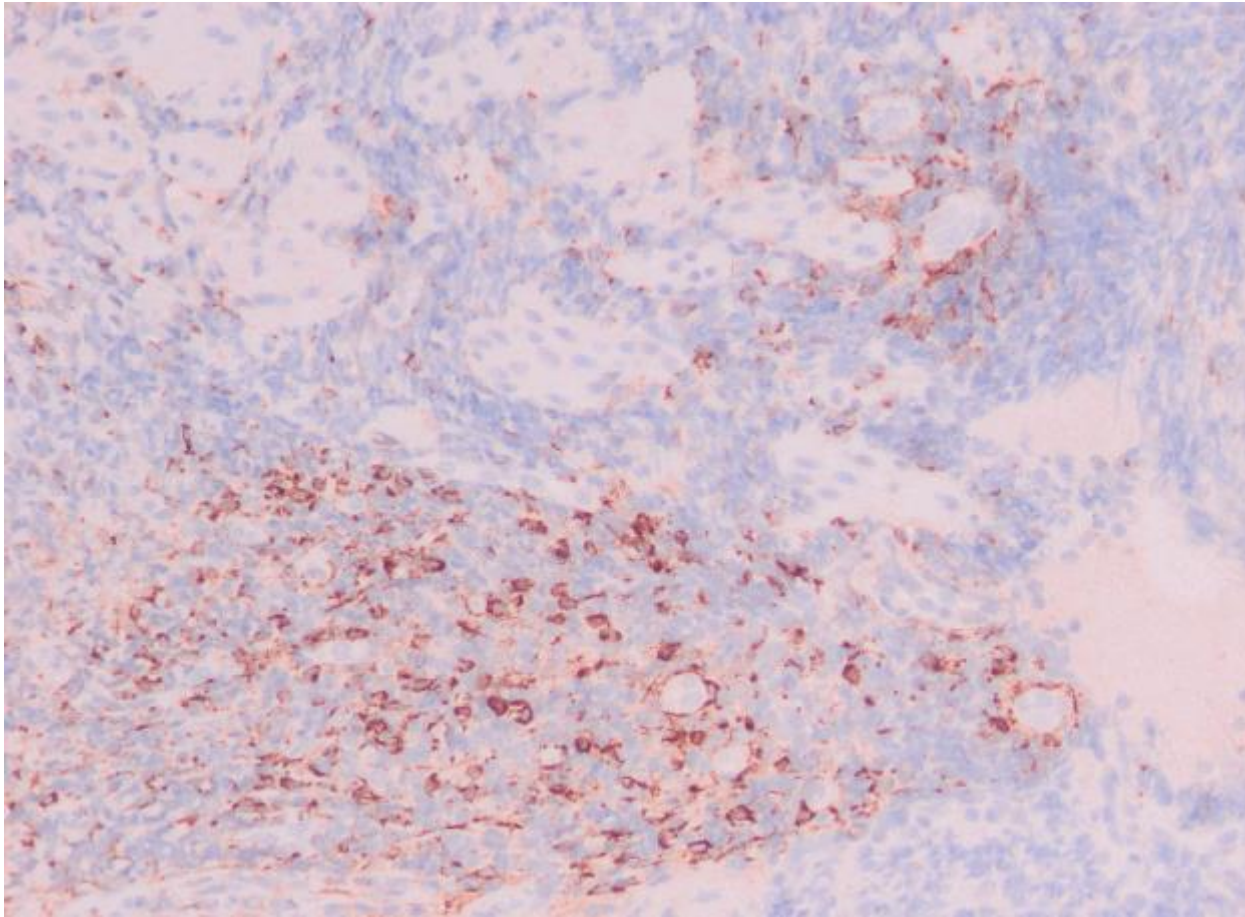

S19-14718 (C1)

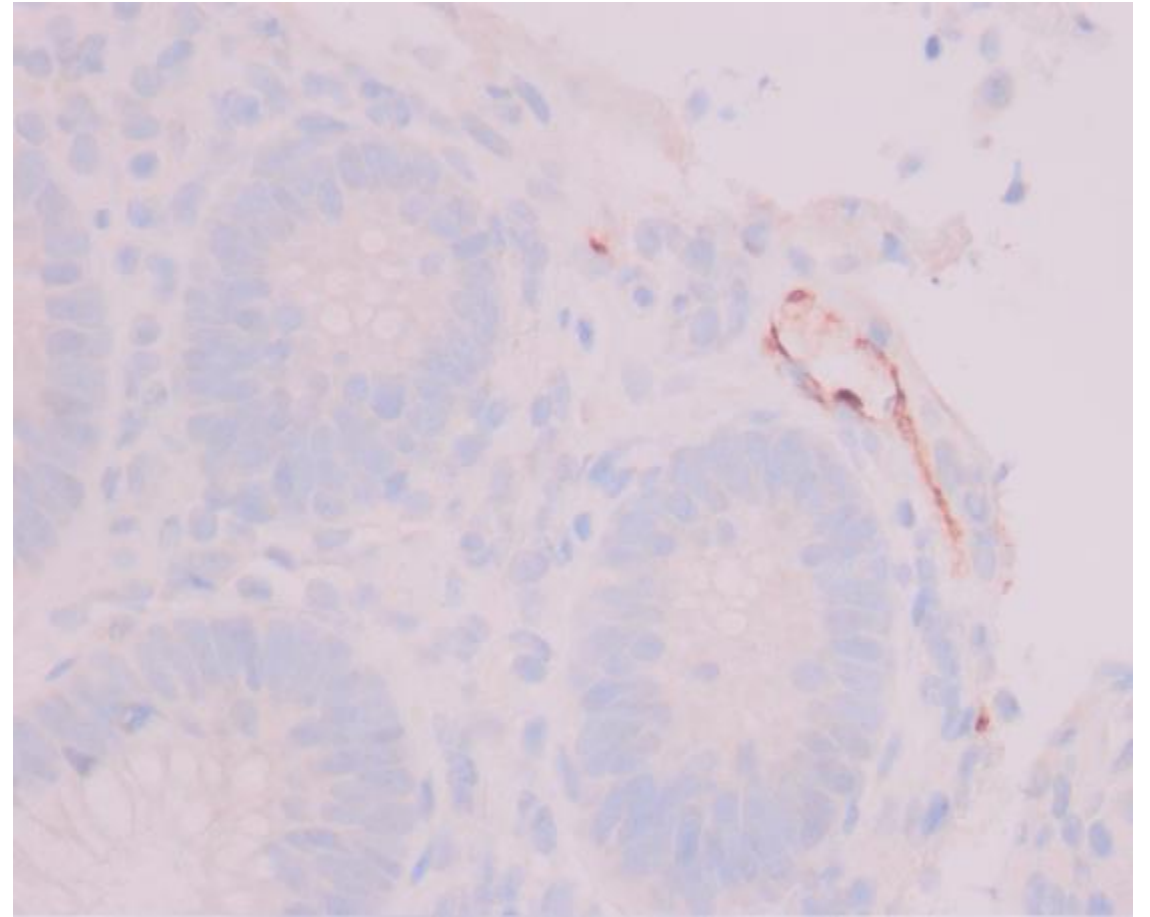

S19-14718 (B1)

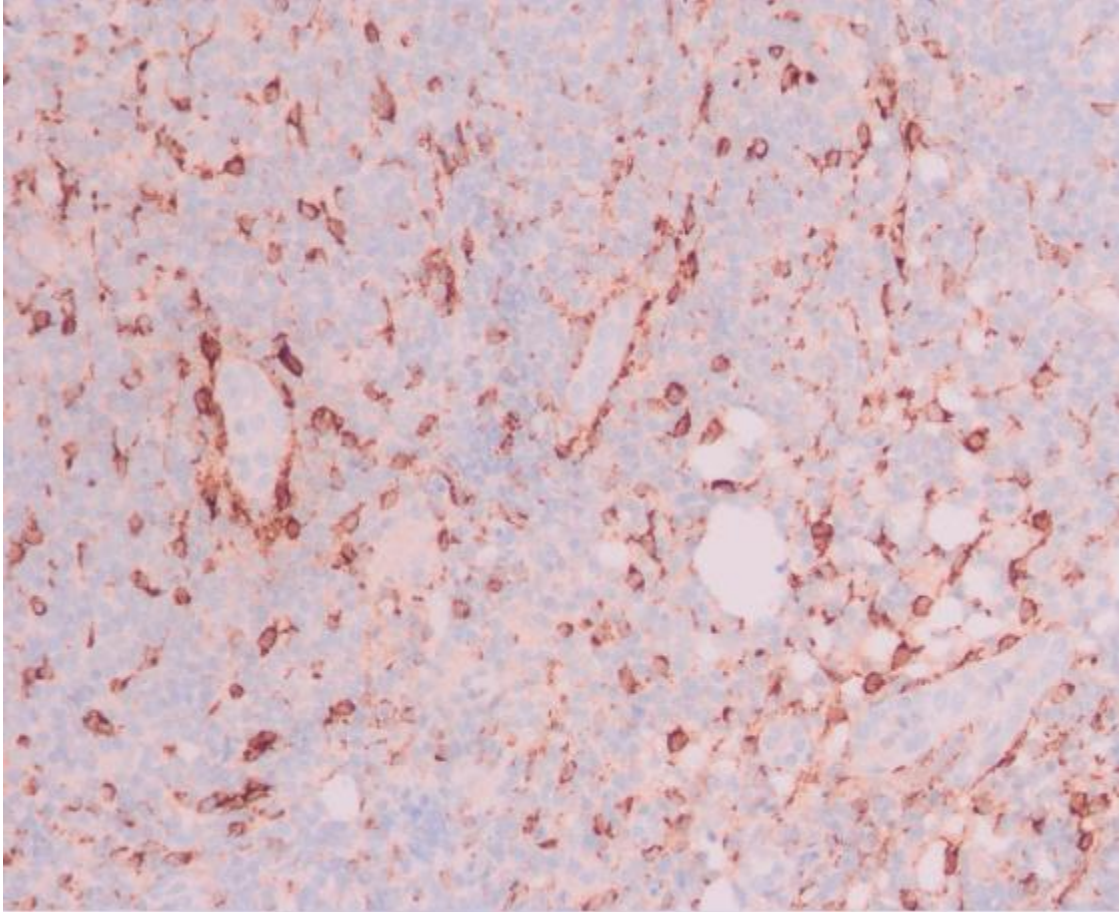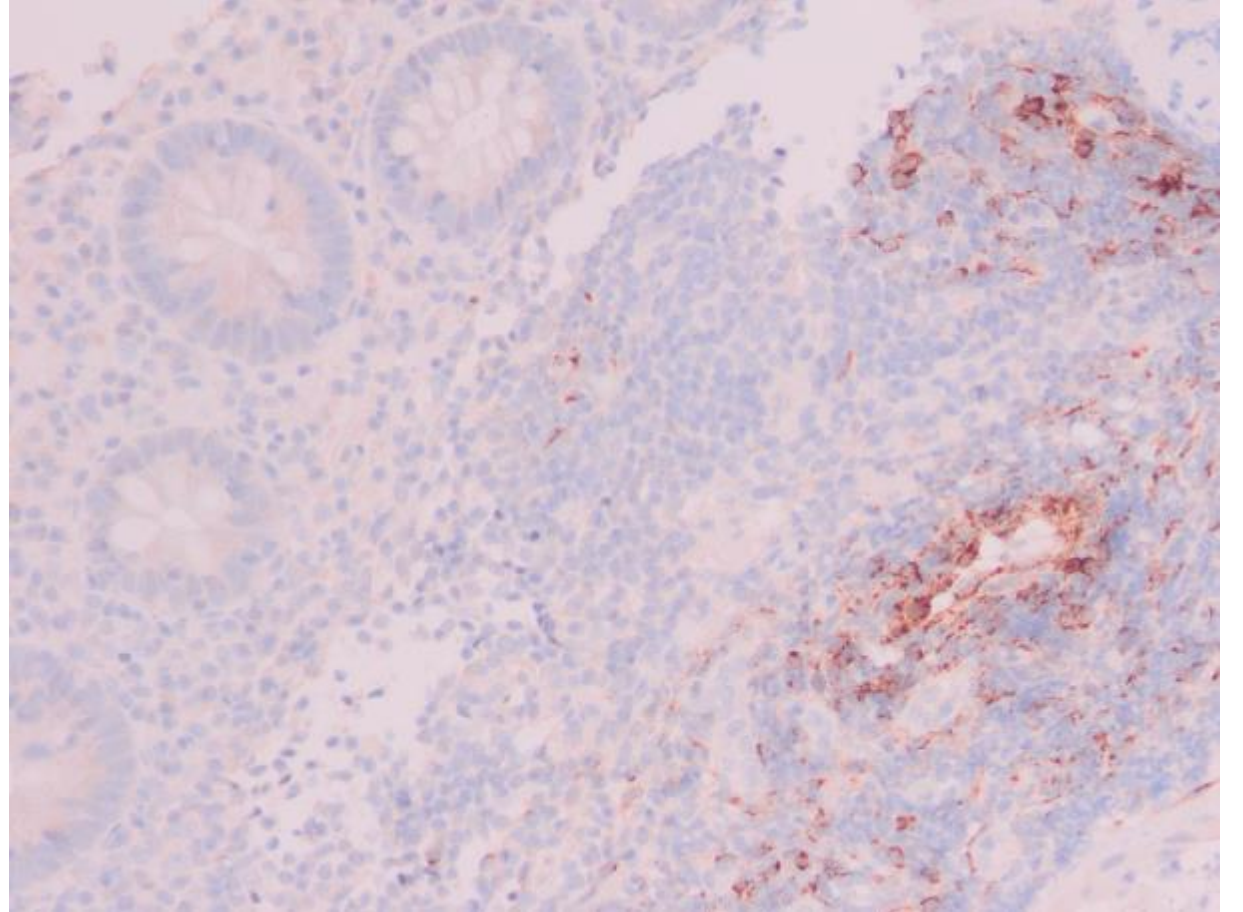

S19-14017 (A1)

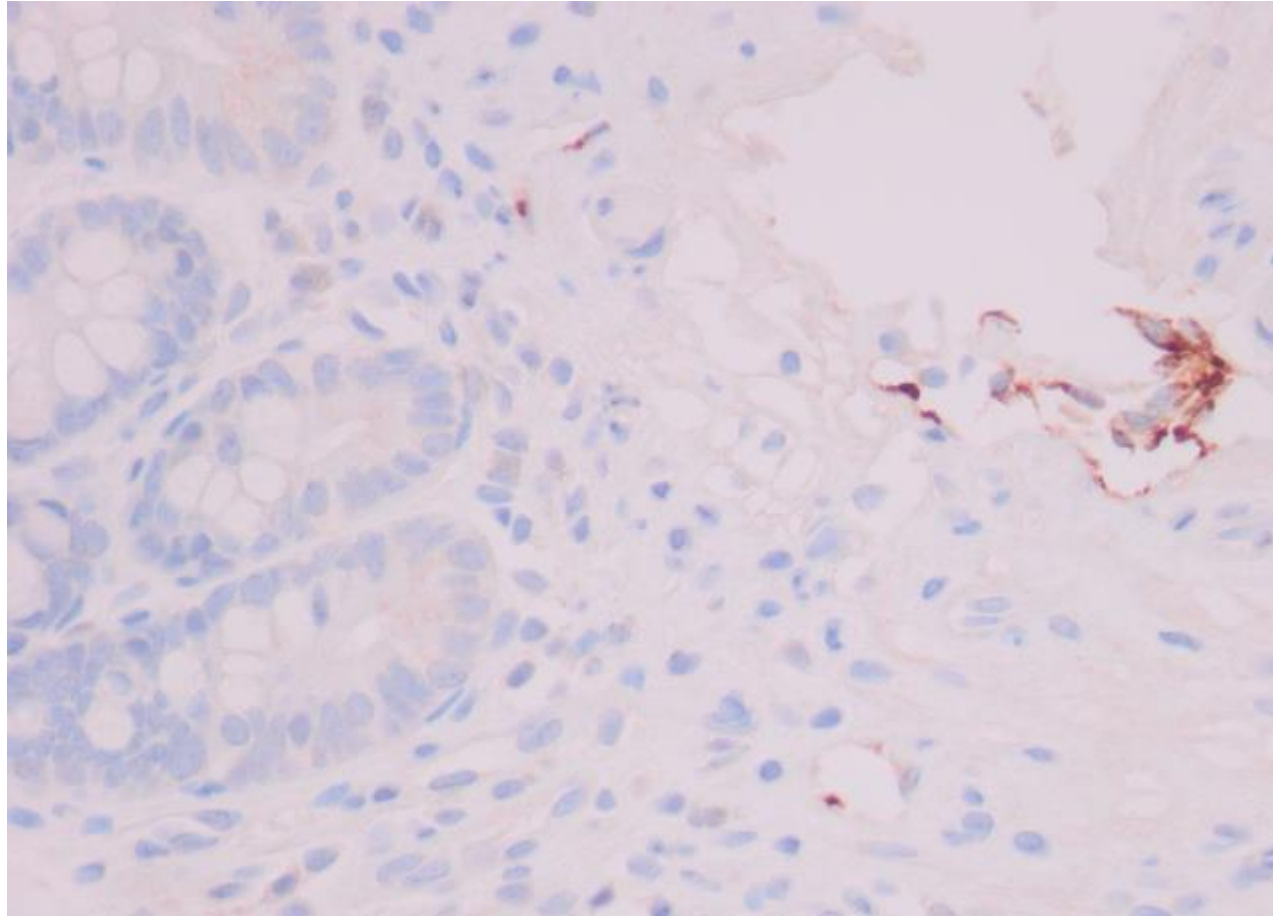

S19-16224 (C1)

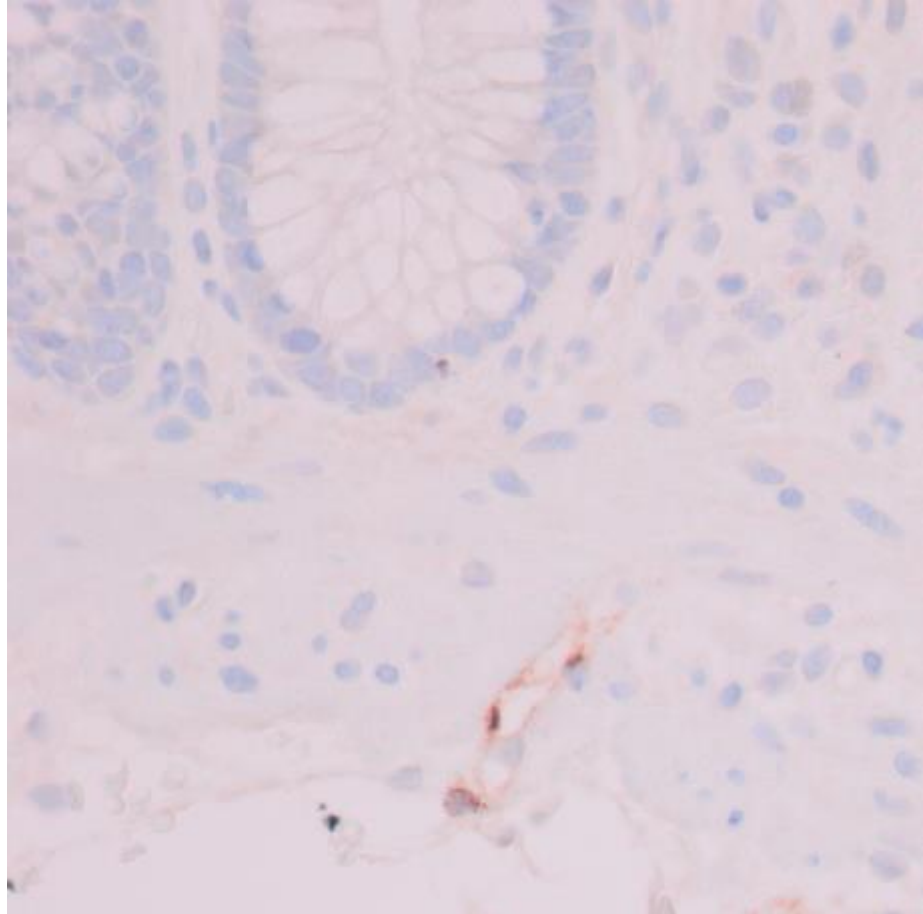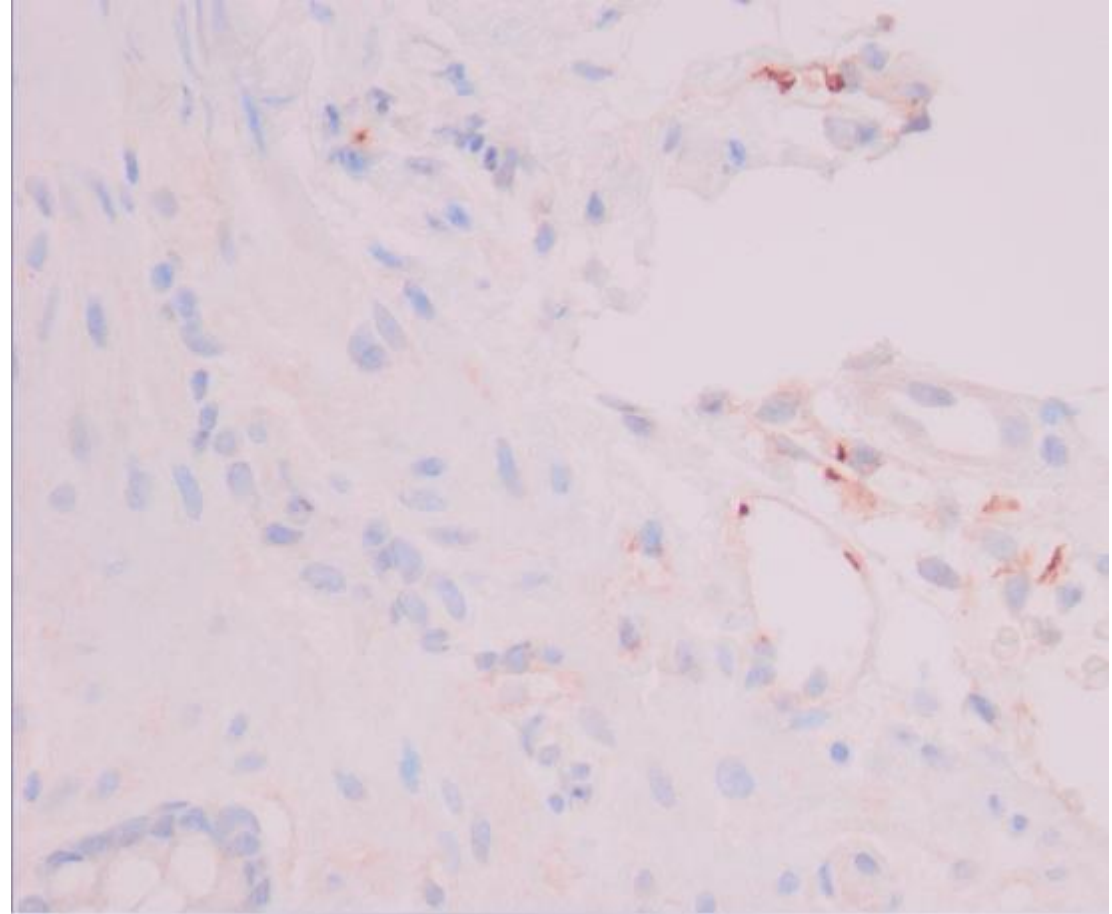

S19-16224 (A1)

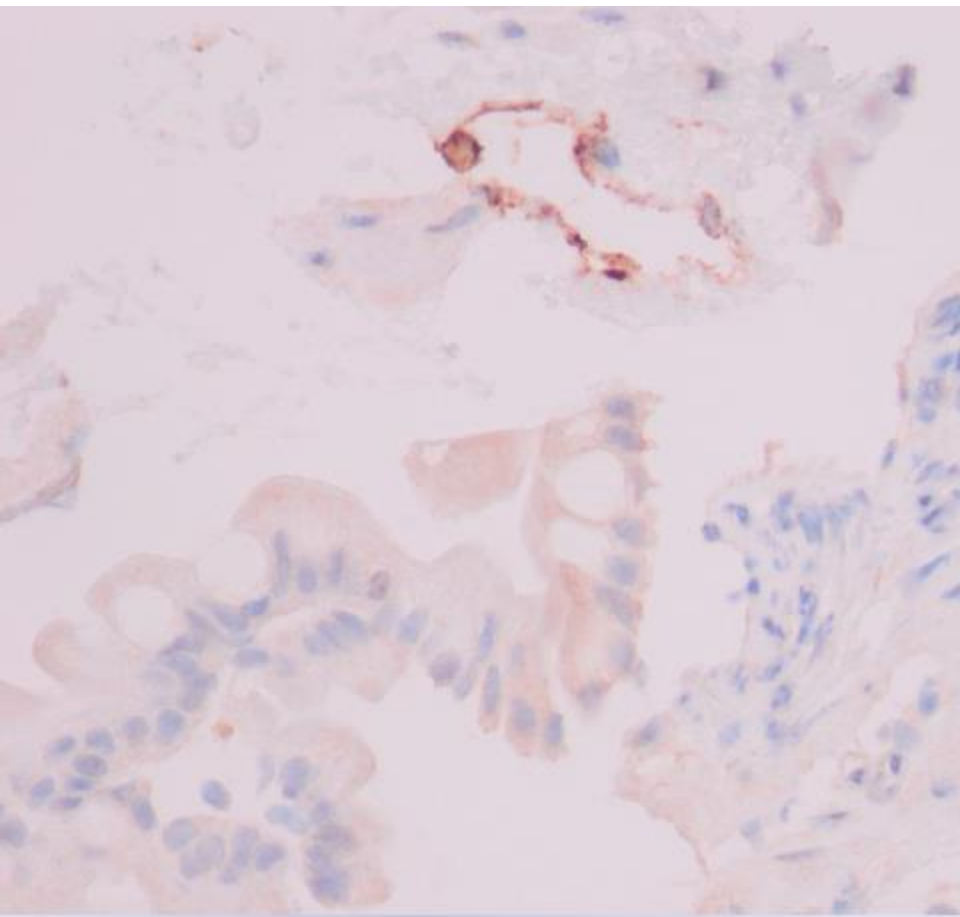

S19-16224 (B1)

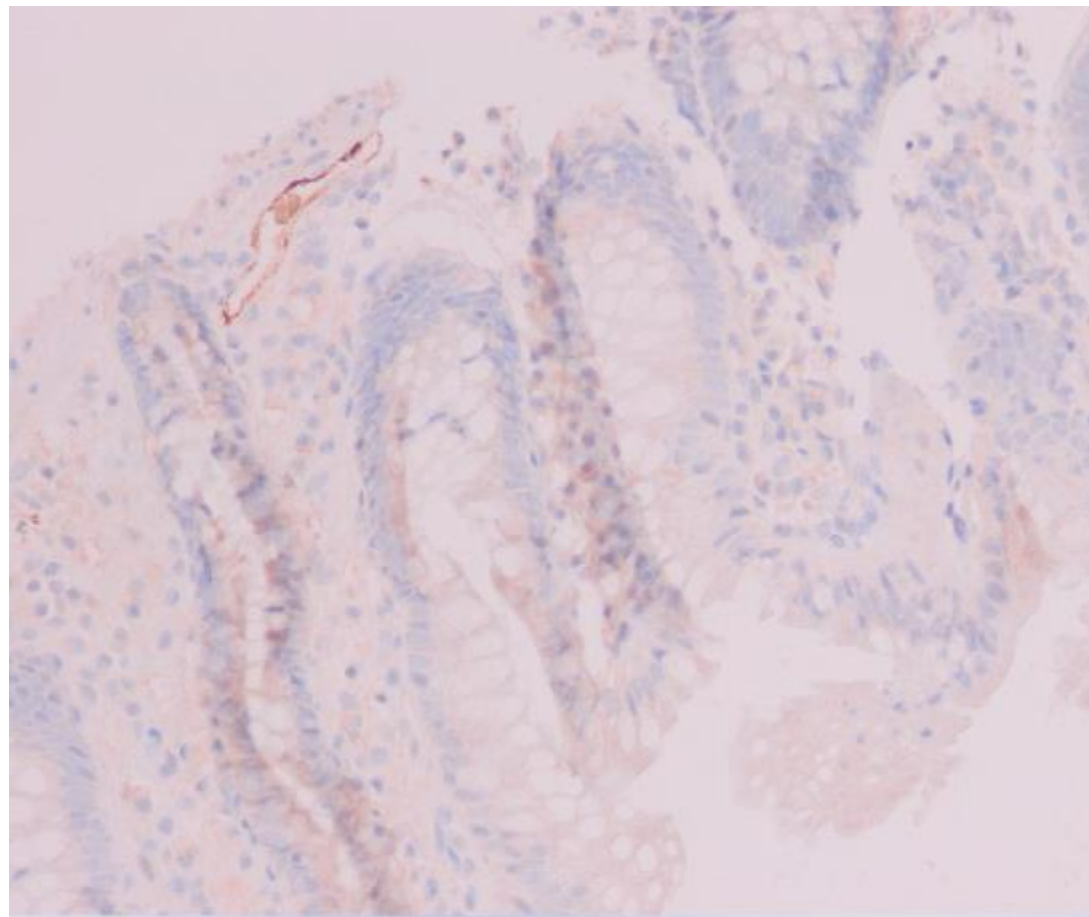

TS19-06556-6A

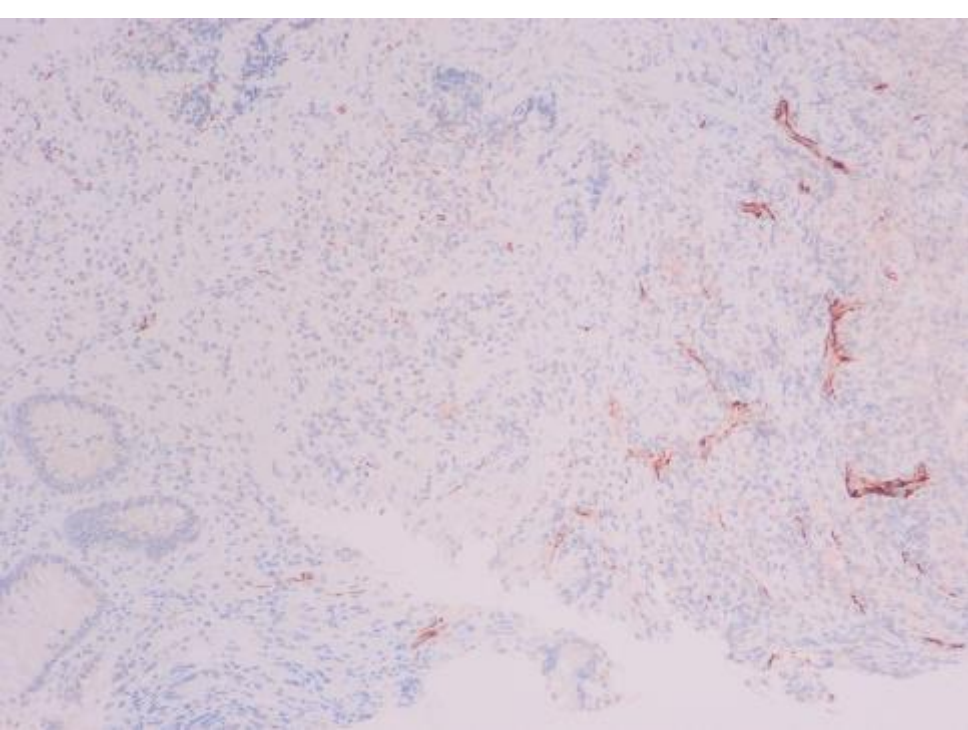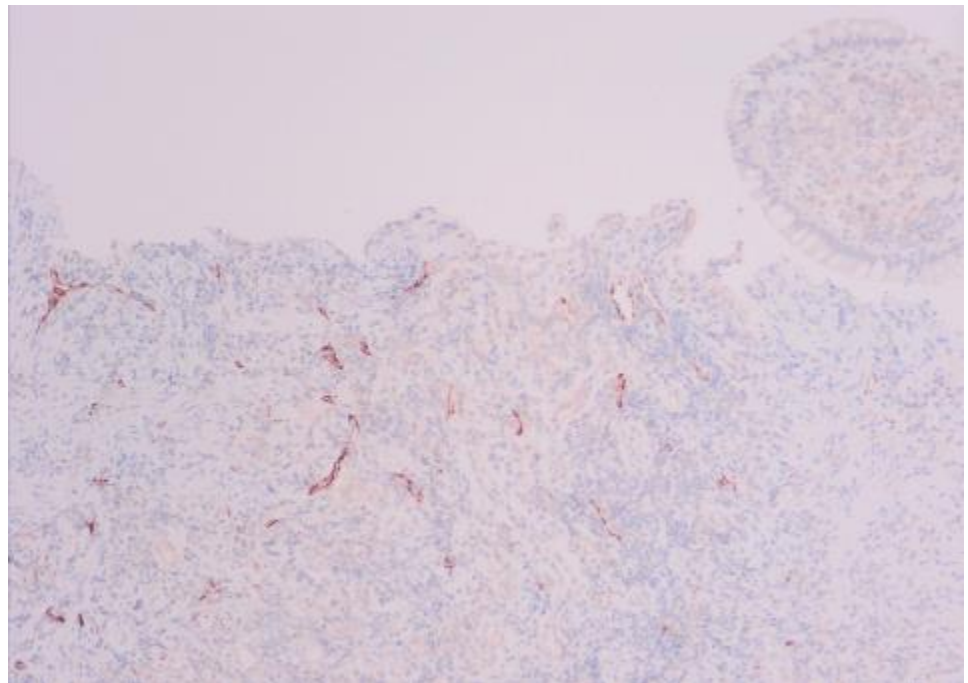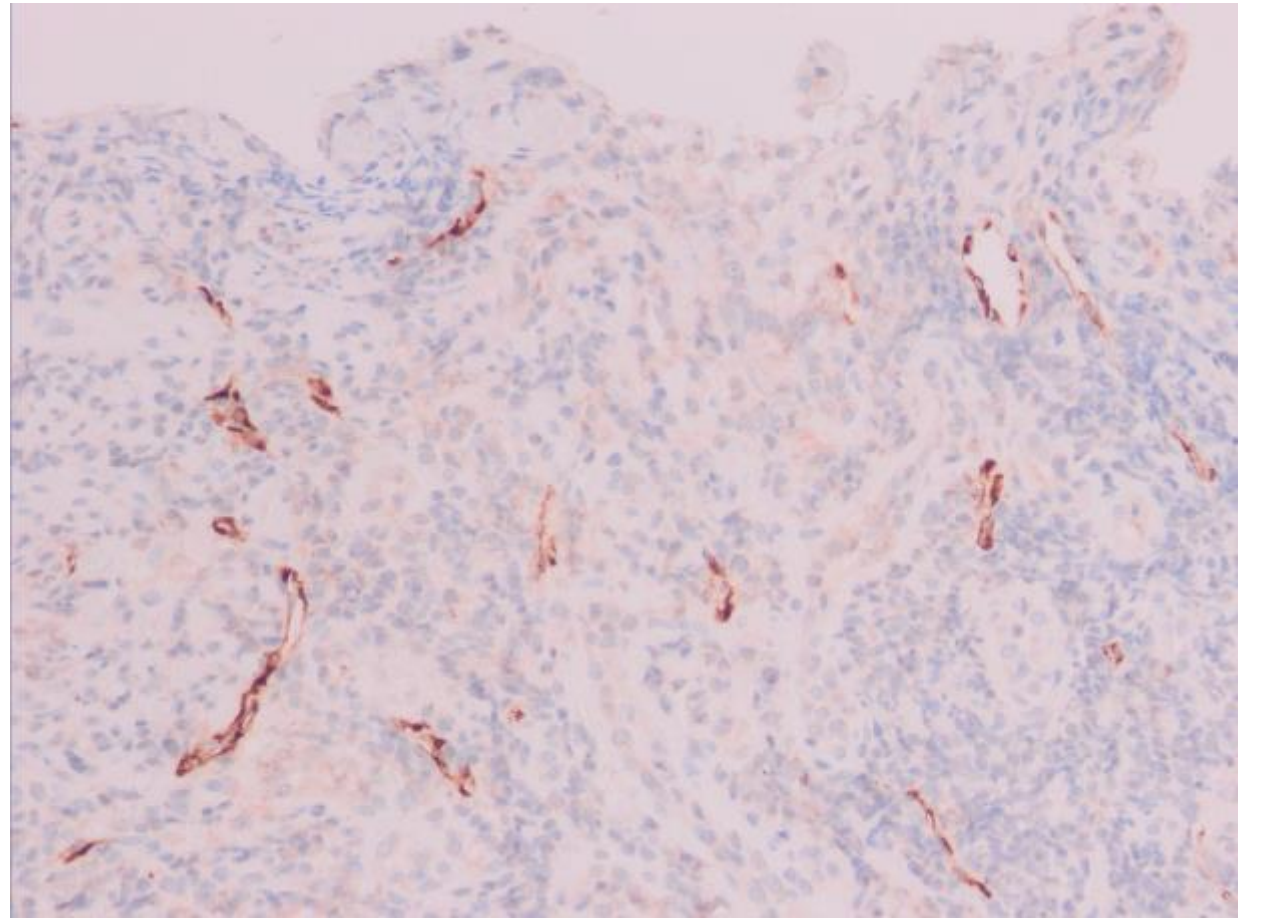

Supplement: pone.0252805.s008.pdf [file pone.0252805.s008.pdf]
