# Supplementary material for: A humanized monoclonal antibody against the endothelial chemokine CCL21 for the diagnosis and treatment of inflammatory bowel disease
Source: PubMed Central journal article supplement (PMC8248966; doi:10.1371/journal.pone.0252805), 2021-07-01
Supplement: pone.0252805.s009.pdf [file pone.0252805.s009.pdf]

|         | Percent migration of CD3+ CD4+ |      |      |      |      |      |      |      |      |      |      |      |      |      |      |      |      |
|---------|--------------------------------|------|------|------|------|------|------|------|------|------|------|------|------|------|------|------|------|
|         | Control                        | V1   | V2   | V3   | V4   | V5   | V6   | V7   | V8   | V9   | V10  | V11  | V12  | V13  | V14  | V15  | V16  |
| Well 1  | 49.5                           | 34.1 | 28.6 | 43.6 | 43.6 | 35.7 | 9.2  | 33.6 | 31   | 29.8 | 37.3 | 36   | 34.7 | 32.7 | 31.8 | 40.3 | 40.9 |
| Well 2  | 58.6                           | 37.9 | 30.2 | 35.9 | 43   | 38.6 | 14.5 | 36.5 | 34.9 | 34.5 | 43.2 | 35.8 | 27.1 | 28.7 | 32.2 | 36.3 | 34.7 |
| Well 3  | 60.2                           | 40.1 | 26.9 | 40.7 | 42.9 | 34.8 | 11.2 | 34.7 | 30.7 | 33.9 | 40.8 | 38.7 | 28.7 | 30.5 | 29.7 | 43.7 | 37.3 |
| Average | 56.1                           | 37.4 | 28.6 | 40.1 | 43.2 | 36.4 | 11.6 | 34.9 | 32.2 | 32.7 | 40.4 | 36.8 | 30.2 | 30.6 | 31.2 | 40.1 | 37.6 |
