# Supplementary material for: A humanized monoclonal antibody against the endothelial chemokine CCL21 for the diagnosis and treatment of inflammatory bowel disease
Source: PubMed Central journal article supplement (PMC8248966; doi:10.1371/journal.pone.0252805), 2021-07-01
Supplement: pone.0252805.s010.pdf [file pone.0252805.s010.pdf]

Donor 1 % CD3+ CD4+ CD8- CCR7+ CD45RA+ CD27+ Migration

| CCL21 (ng/mL) | Control |        |        | 100ug V6 |        |        |
|---------------|---------|--------|--------|----------|--------|--------|
|               | Well 1  | Well 2 | Well 3 | Well 1   | Well 2 | Well 3 |
| 0             | 0       | 0      | 0      | 0        | 0      | 0      |
| 100           | 10.1    | 9.4    | 5.5    | 0        | 1.2    | 0      |
| 500           | 28.7    | 25.8   | 29.2   | 2.1      | 0      | 1.6    |
| 800           | 36.7    | 34.8   | 33.6   | 5.6      | 4.3    | 2.1    |
| 1200          | 49.6    | 46.7   | 49.3   | 11       | 10.2   | 13.6   |
| 1600          | 46.8    | 50.1   | 48.8   | 14.8     | 10.9   | 15.2   |

Donor 2 % CD3+ CD4+ CD8- CCR7+ CD45RA+ CD27+ Migration

| CCL21 (ng/mL) | Control |        |        | 100ug V6 |        |        |
|---------------|---------|--------|--------|----------|--------|--------|
|               | Well 1  | Well 2 | Well 3 | Well 1   | Well 2 | Well 3 |
| 0             | 0       | 1.6    | 0      | 0        | 1.6    | 0      |
| 100           | 8.4     | 12.7   | 11.3   | 0        | 3.8    | 0      |
| 500           | 24.7    | 30.2   | 22.8   | 5.32     | 7.85   | 6.66   |
| 800           | 45.7    | 40.3   | 49.2   | 9.84     | 11.74  | 14.52  |
| 1200          | 60.2    | 64.3   | 61.7   | 19.23    | 22.87  | 24.25  |
| 1600          | 58.9    | 66.4   | 60.9   | 25.12    | 29.41  | 24.77  |

Donor 3 % CD3+ CD4+ CD8- CCR7+ CD45RA+ CD27+ Migration

| CCL21 (ng/mL) | Control |        |        | 100ug V6 |        |        |
|---------------|---------|--------|--------|----------|--------|--------|
|               | Well 1  | Well 2 | Well 3 | Well 1   | Well 2 | Well 3 |
| 0             | 0       | 0      | 0      | 0        | 0      | 0      |
| 100           | 8.4     | 2.7    | 6.66   | 0        | 0      | 0      |
| 500           | 17.2    | 15.4   | 11.9   | 2.9      | 3.33   | 1.8    |
| 800           | 28.4    | 25.8   | 22.4   | 10.9     | 8.1    | 7.06   |
| 1200          | 32.8    | 36.1   | 30.8   | 8.7      | 10.2   | 6.9    |
| 1600          | 44.6    | 46.7   | 40.1   | 14.2     | 16.7   | 12.9   |
